# Supplementary material for: Novel porphyrin-based donor–acceptor conjugated organic polymers for efficient photocatalytic production of hydrogen peroxide in pure water
Source: Royal Society of Chemistry journal article supplement (doi:10.1039/d3nj05736d), 2024-01-01
Supplement: d3nj05736d1.pdf [file d3nj05736d1.pdf]

## Supporting information

### Novel porphyrin-based donor-acceptor conjugated organic polymers for efficient photocatalytic production of hydrogen peroxide in pure water

Renbao Zhang<sup>a,1</sup>, Hui Zhao<sup>a,1</sup>, Chengsi Pan<sup>a</sup>, Jiawei Zhang<sup>a</sup>, Liang Jian<sup>a</sup>, Xinyu Sun<sup>a</sup>,  
Rong Ji<sup>a</sup>, Jiawei Li<sup>a</sup>, Yuming Dong<sup>a,\*</sup>, and Yongfa Zhu<sup>b</sup>

<sup>a</sup>*International Joint Research Center for Photoresponsive Molecules and Materials, Key Laboratory of Synthetic and Biological Colloids, School of Chemical and Material Engineering, Jiangnan University, Wuxi 214122, China.*

<sup>b</sup>*Department of Chemistry, Tsinghua University, Beijing 100084, China.*

<sup>1</sup>*These authors contributed equally: Renbao Zhang, Hui Zhao.*

\*e-mail: [dongym@jiangnan.edu.cn](mailto:dongym@jiangnan.edu.cn)

## 1. Test Methods

### 1.1. Determination of H<sub>2</sub>O<sub>2</sub> concentration

The concentration of H<sub>2</sub>O<sub>2</sub> was determined using the traditional titanium potassium oxalate titration method and the absorption peak measured was 400 nm. Preparation of titanium potassium oxalate solution: 1.77 g of titanium potassium oxalate, 12 mL of concentrated sulfuric acid, formulated into a 250mL solution, which was fixed in a 250 mL volumetric flask. Pipette 3 ml of the solution to be measured with a pipette gun, transfer it to 2 ml of potassium titanium oxalate solution, let it stand for 5 min, and measure it with a UV-Vis spectrophotometer.

### 1.2. Photochemical decomposition of H<sub>2</sub>O<sub>2</sub> on materials

The decomposition of H<sub>2</sub>O<sub>2</sub> was carried out by dispersing the catalyst (10 mg) in an aqueous solution (20 mL) containing H<sub>2</sub>O<sub>2</sub> (0.8 mM) under Ar atmosphere. Visible light irradiation ( $\lambda > 420$  nm) was achieved using a cut-off filter with a 300 W Xe lamp as a light source. The concentration of H<sub>2</sub>O<sub>2</sub> was measured as described above.

### 1.3. Solar-to-chemical energy conversion (SCC) efficiency

Photocatalytic experiments simulating solar irradiation (A.M 1.5G, 100 mW cm<sup>-2</sup>) were realized using a 300 W Xe lamp as a light source and a cut-off filter to determine the SCC efficiency. The catalyst (160 mg) and water (40 mL) were placed in a sealed device consisting mainly of quartz tubes and sealing components, and O<sub>2</sub> was continuously energized for 1 h of light irradiation.

$$\text{SCC efficiency(\%)} = \frac{[\Delta G \text{ for } H_2O_2 \text{ generation}(Jmol^{-1})][H_2O_2 \text{ formed}(mol)]}{[Total \text{ input power}(W)][Reaction \text{ time}(s)]} \times 100\%$$

Where  $\Delta G=117$  kJmol<sup>-1</sup>.

### 1.4. Apparent quantum yield (AQY) measurements

The apparent quantum yield (AQY) was measured under irradiation with 300 W Xe lamps with different bandpass filters ( $\lambda_0 \pm 20$  nm) for 1 h. Catalyst (160 mg) and water (40 mL) were placed in a sealed unit consisting primarily of quartz tubes and sealing components and continuously passed through O<sub>2</sub>. The average irradiation intensity was determined to be 10.0 mW·cm<sup>-2</sup> by means of an ILT 950 spectroradiometer and the irradiated area was controlled to be 3.14 cm<sup>2</sup>.

$$N(\text{mol}) = \frac{E}{hv}$$
$$\text{AQY(\%)} = \frac{[H_2O_2 \text{ generated}(mol)] \times 2}{N} \times 100\%$$

### 1.5. Rotating disk electrode (RDE) measurements

The rotating disk electrode (RDE) was tested in O<sub>2</sub> saturated phosphate buffer (0.1 M, pH=6.9), with the disk electrode as the working electrode, the platinum ring as the counter electrode, and the Ag/AgCl electrode as the reference electrode. The

working electrode was prepared by dispersing the photocatalyst (5 mg) in ethanol (1 ml) containing Nafion (50  $\mu\text{L}$ ), and then the mixture (20  $\mu\text{L}$ ) to the disk electrode and dried at room temperature. Linear scanning voltammetry (LSV) tests were performed at a scanning speed of 10  $\text{mV}\cdot\text{s}^{-1}$  and at different rotational speeds. The average number of electrons ( $n$ ) was calculated from the Koutecky-Levich equation:

$$\frac{1}{J} = \frac{1}{J_L} + \frac{1}{J_K} = \frac{1}{B\omega^{1/2}} + \frac{1}{J_K}$$

$$B = 0.2nFC_0D_0^{2/3}\nu^{-1/6}$$

where  $J$  is the measured current density,  $\omega$  is the angular velocity,  $n$  is the number of transferred electrons,  $F$  is the Faraday's constant ( $96485 \text{ C}\cdot\text{mol}^{-1}$ ),  $C_0$  is the volumetric concentration of  $\text{O}_2$  ( $1.26 \times 10^{-6} \text{ mol}\cdot\text{cm}^{-3}$ ),  $D_0$  is the diffusion coefficient of  $\text{O}_2$  in 0.1 M phosphate buffer solution ( $2.7 \times 10^{-5} \text{ cm}^2\cdot\text{s}^{-1}$ ), and  $\nu$  is the kinetic viscosity of the electrolyte ( $0.01 \text{ cm}^2\cdot\text{s}^{-1}$ ).

## 1.6. Nitroblue tetrazolium (NBT) method for the detection of $\cdot\text{O}_2^-$

NBT method: 10 mg of catalyst was dispersed in 20 ml of aqueous NBT solution at a concentration of  $2.0 \times 10^{-5} \text{ M}$ . The temperature was controlled at 25  $^\circ\text{C}$  by circulating water, and then irradiated under a light source of a 300 W xenon lamp (equipped with a cut 420 nm filter). Prior to irradiation, the suspension was exposed to  $\text{O}_2$  for 10 min in the dark, and after irradiation, samples were taken at specific times, 2 ml at a time. The photocatalytic production of  $\cdot\text{O}_2^-$  was determined by the degradation of NBT and was detected by absorbance at a wavelength of 259 nm. The molar ratio of generated  $\cdot\text{O}_2^-$  to degraded NBT was 4:1.

## 1.7. Electron spin resonance (ESR) experimental steps

The ESR was tested using the EMXplus-10/12 (Brooklyn, Germany). Before testing, 2 ml of methanol solution with a catalyst concentration of 0.5 mg/mL was first prepared. Then the original DMPO solution was diluted 10 times. Before illumination, 20  $\mu\text{L}$  of the diluted DMPO solution was added to 200  $\mu\text{L}$  of the material dispersion, mixed well, and subjected to free radical testing under dark conditions. The above mixture was then placed under a xenon lamp light source for 10 min for free radical testing under light.

## 1.8. In-situ DRIFTS Characterization

In situ Fourier transform infrared (in situ FT-IR) spectroscopic measurements were performed using a Nicolet iS50 spectrometer (Thermo, USA). Samples were first prepared by dispersing 5 mg of catalyst in 2 ml of ethanol solution containing 50  $\mu\text{L}$  of Nafion resin. The silicon crystals were then polished and sanded to make the surface smooth. Next, 20  $\mu\text{L}$  of the suspension was evenly dripped onto the surface of the silicon crystals and dried under an infrared lamp. Finally, an appropriate amount of aqueous solution was added to the reaction cell, connected to an IR instrument, and tested under continuous  $\text{O}_2$  passages.

## 2. Supporting information

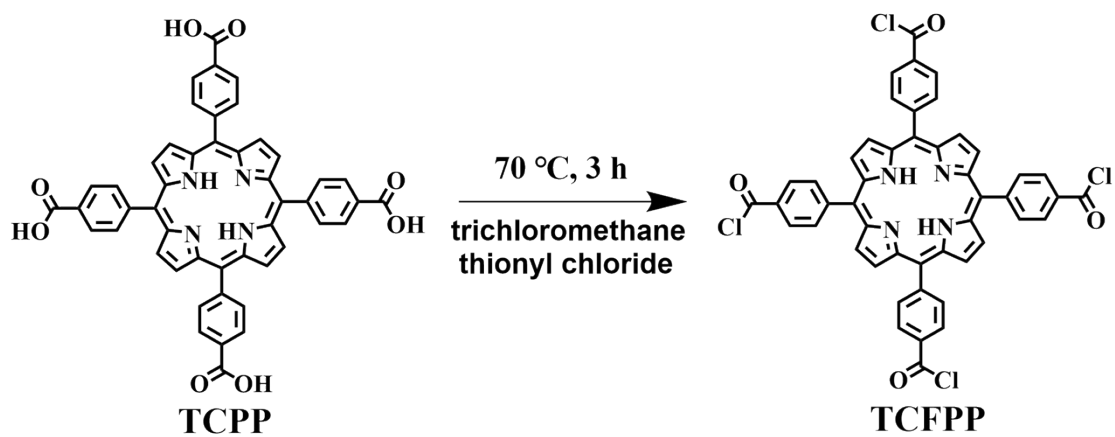

Figure S1: Schematic of TCFPP synthesis.

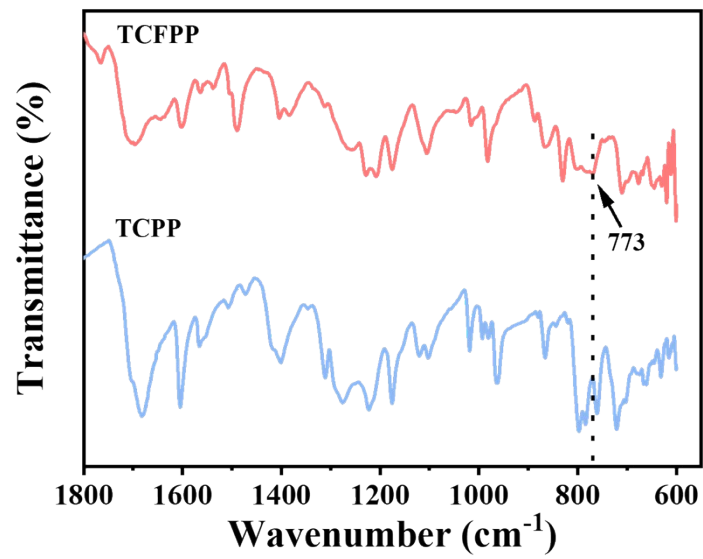

Figure S2: FT-IR spectra of TCP and TCFPP.

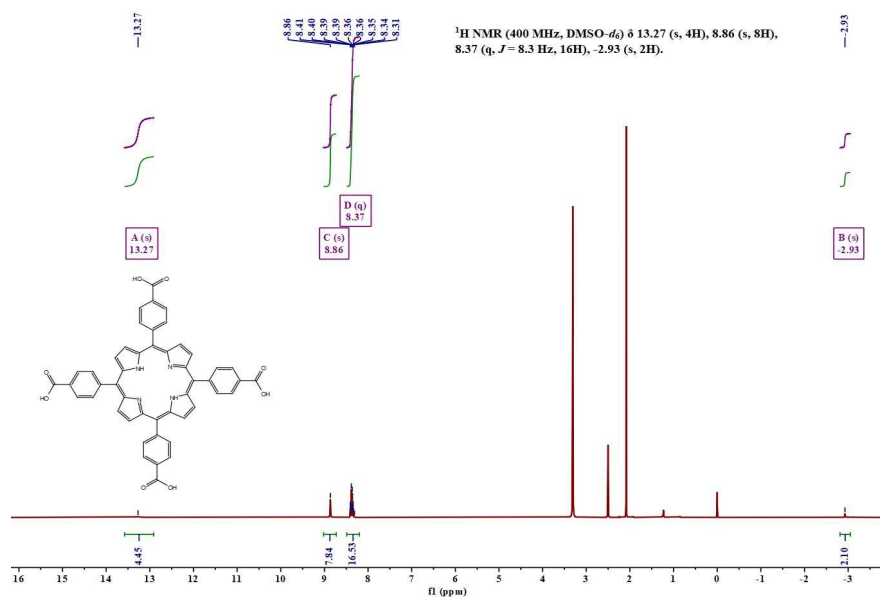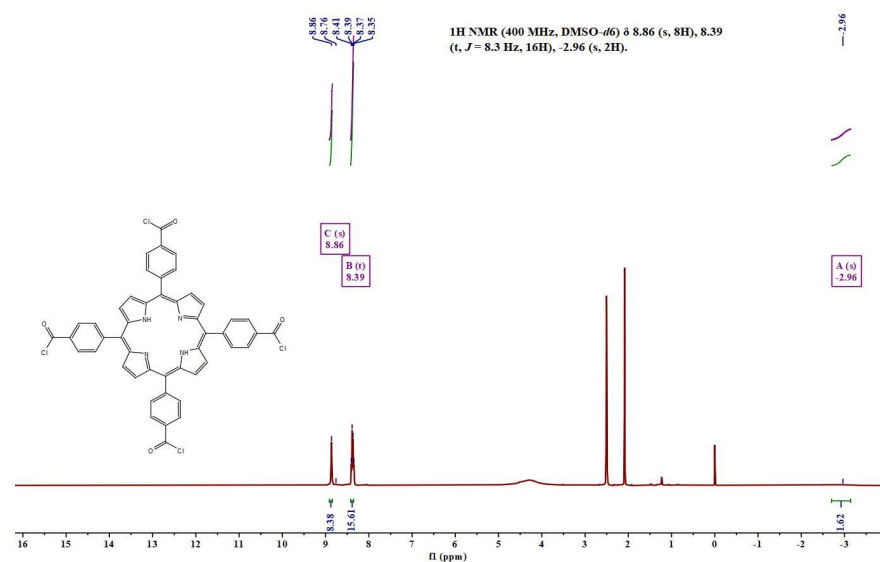

Figure S3: <sup>1</sup>H NMR of TCPP and TCFPP.

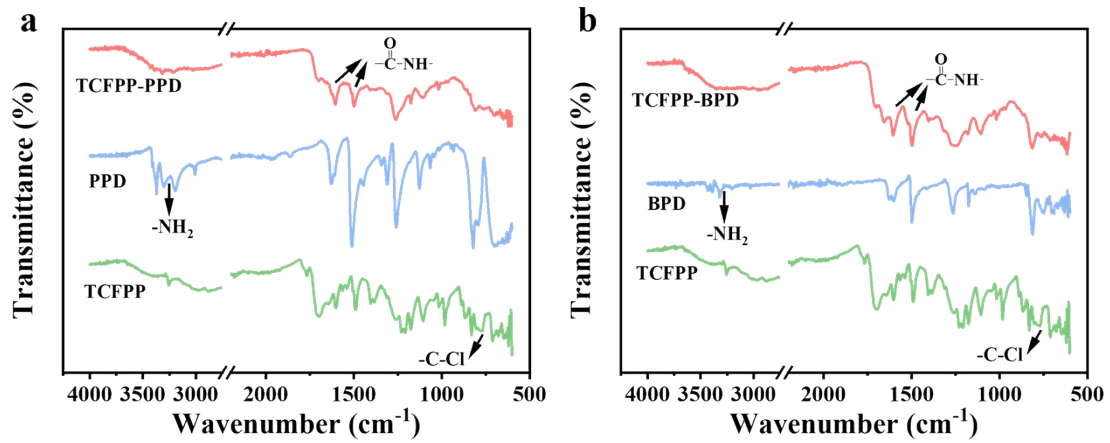

Figure S4: FT-IR spectra of (a) TCFPP-PPD and (b) TCFPP-BPD.

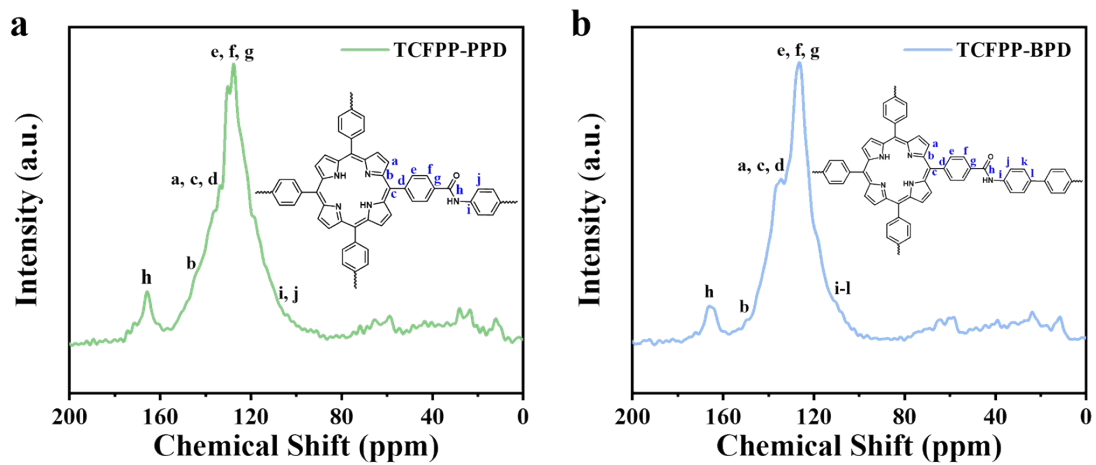

Figure S5:  $^{13}\text{C}$  solid-state NMR spectra of (a) TCFPP-PPD, (b) TCFPP-BPD.



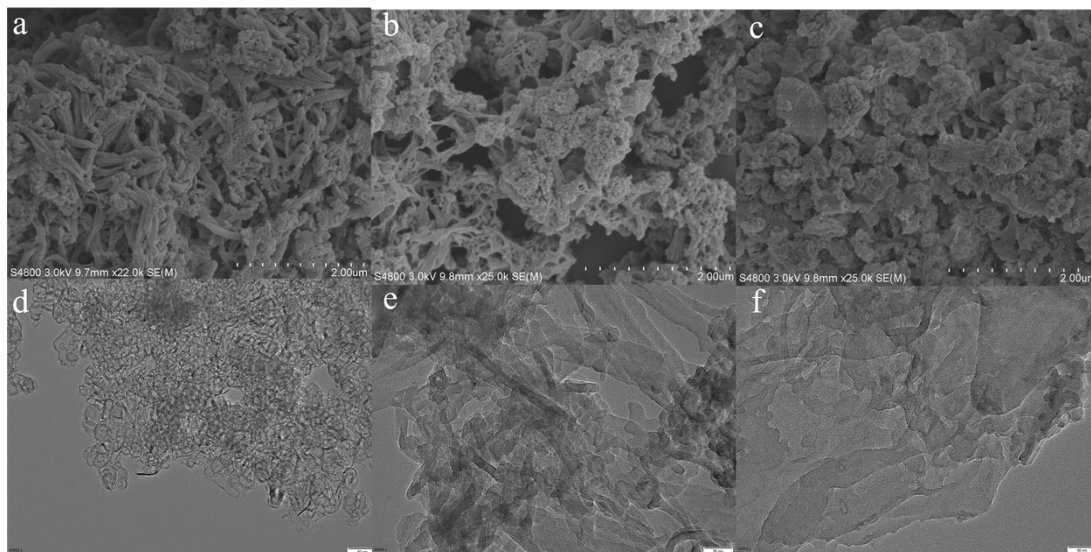

Figure S6: SEM (a), (b), (c) and TEM (d), (e), (f) images of TCFPP-PPD, TCFPP-BPD and TCFPP-TPD.

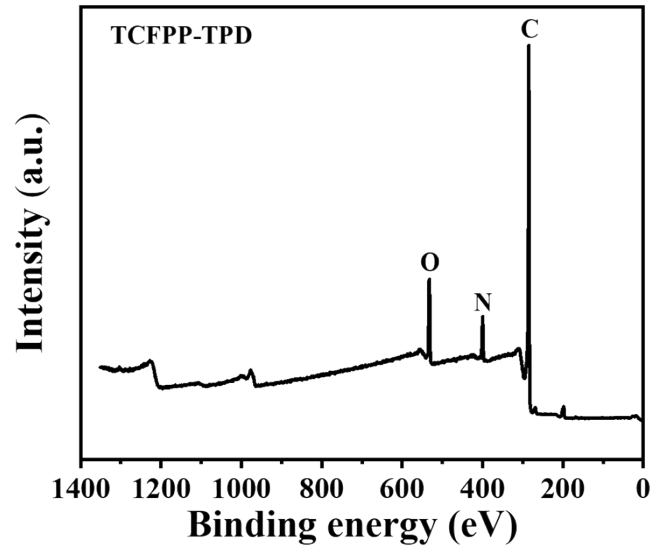

Figure S7: XPS total spectrum of TCFPP-TPD.

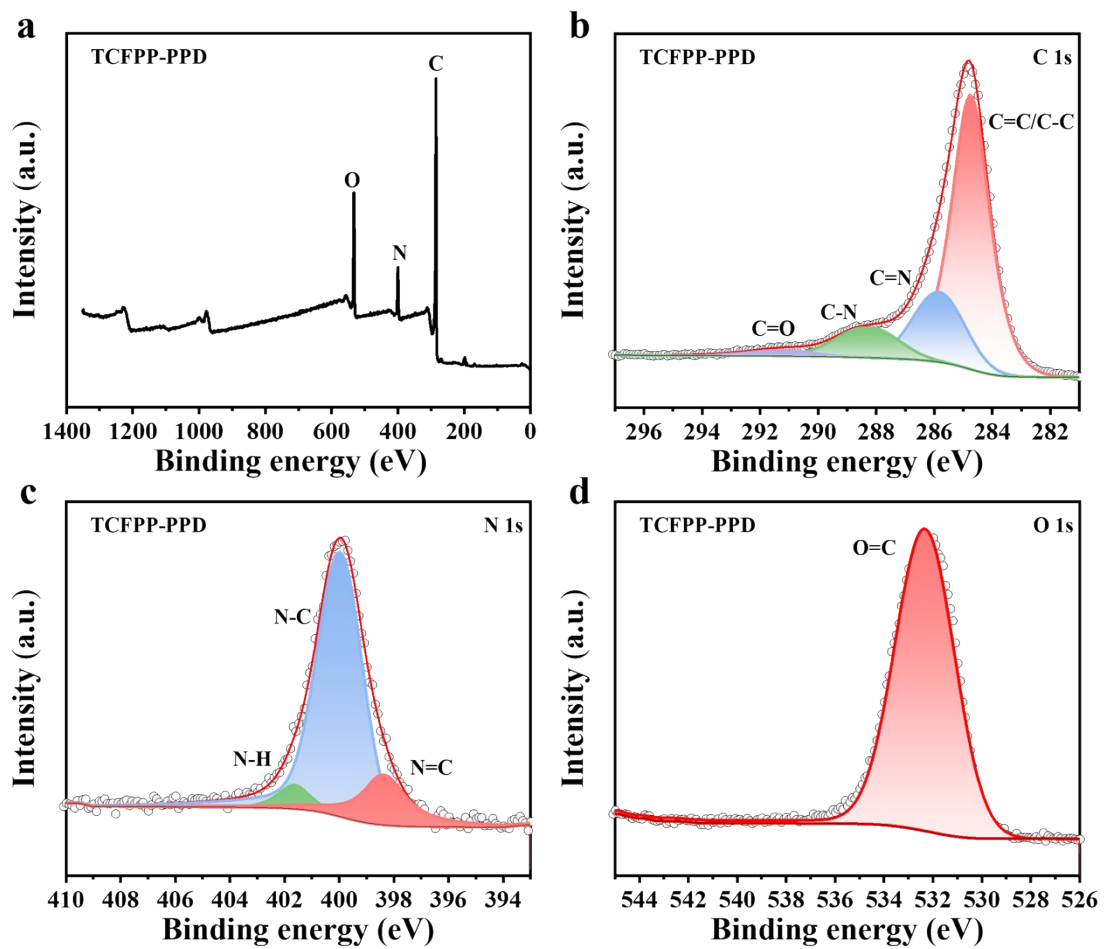

Figure S8: XPS profiles of TCFPP-PPD: (a) total spectrum; (b) C 1s; (c) N 1s; (d) O 1s.

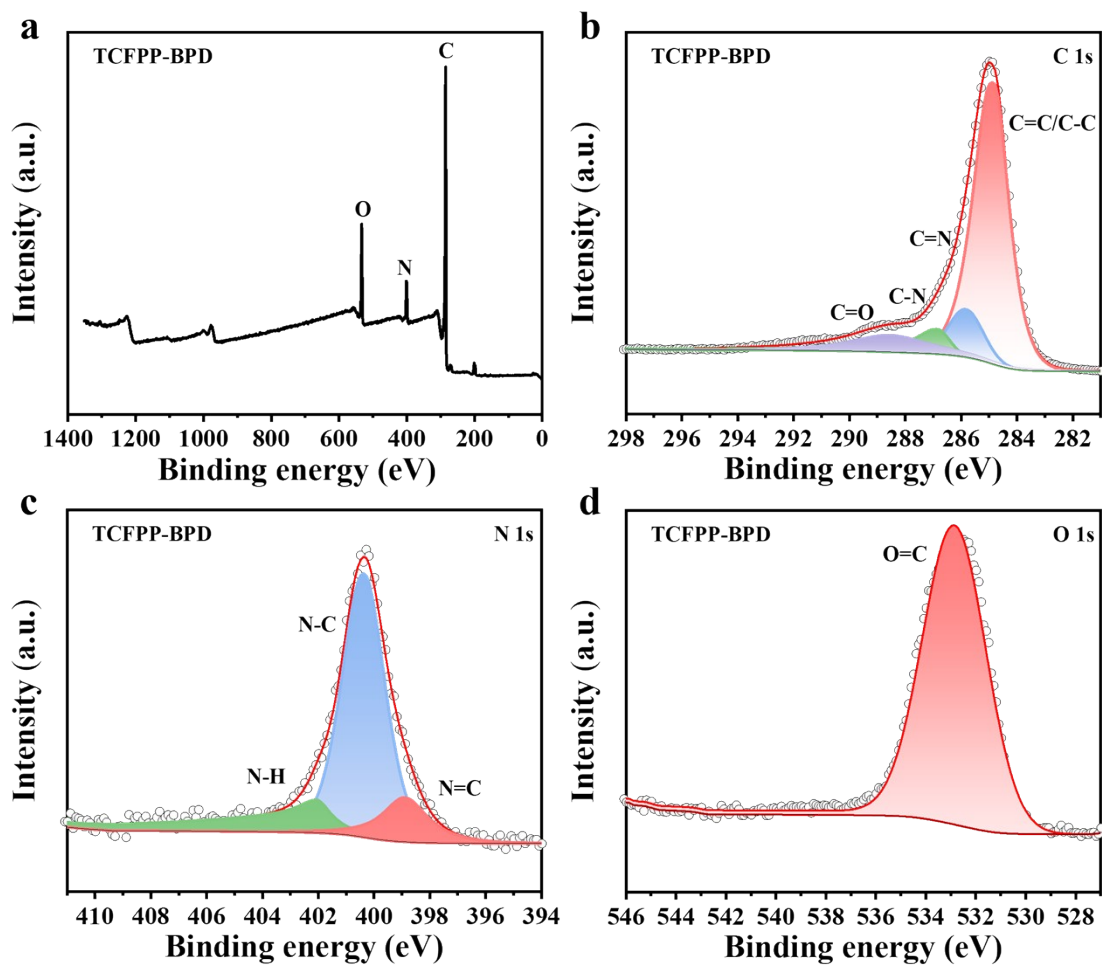

Figure S9: XPS profiles of TCFPP-BPD: (a) total spectrum; (b) C 1s; (c) N 1s; (d) O 1s.

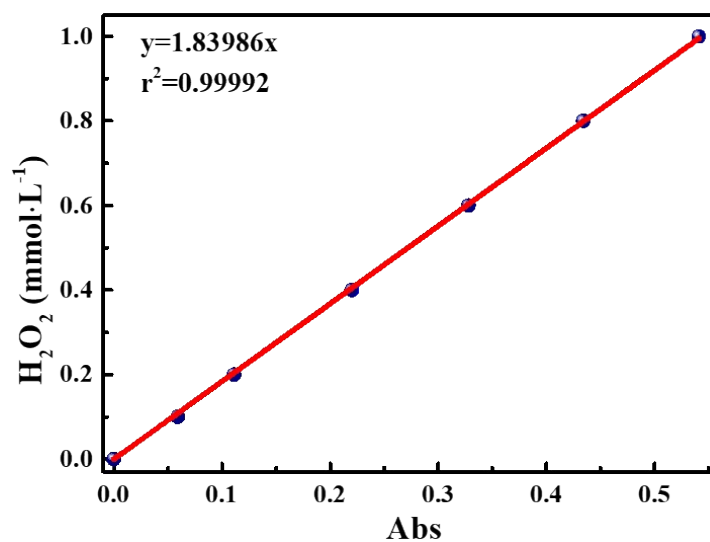

Figure S10: Fitted curve of UV-visible absorbance with H<sub>2</sub>O<sub>2</sub> concentration.

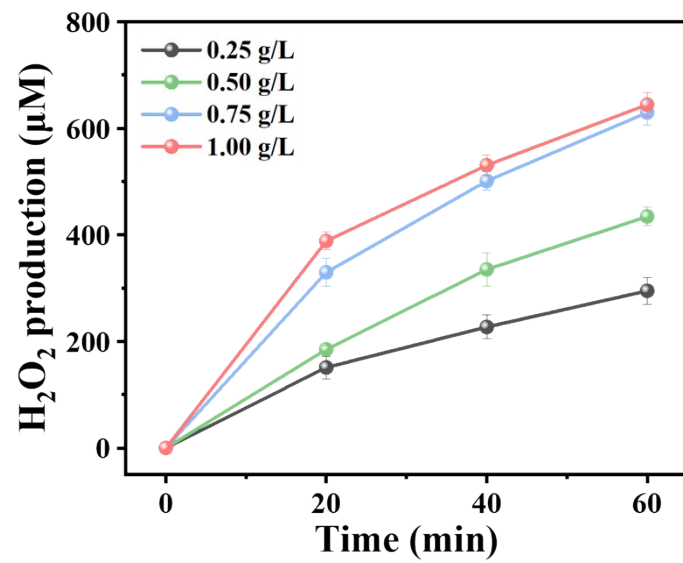

Figure S11: H<sub>2</sub>O<sub>2</sub> production at different concentrations of TCFPP-TPD.

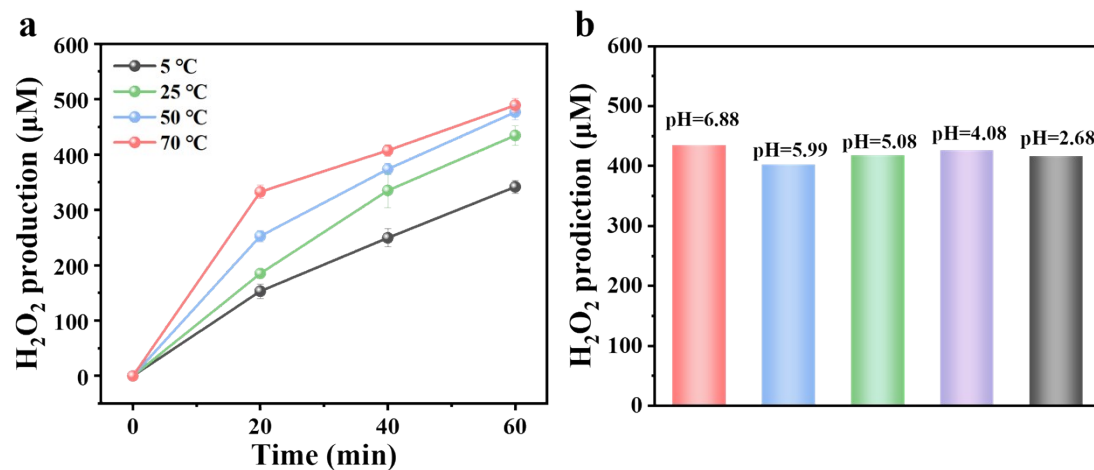

Figure S12: H<sub>2</sub>O<sub>2</sub> yield of TCFPP-TPD under different conditions (a) temperature; (b) pH.

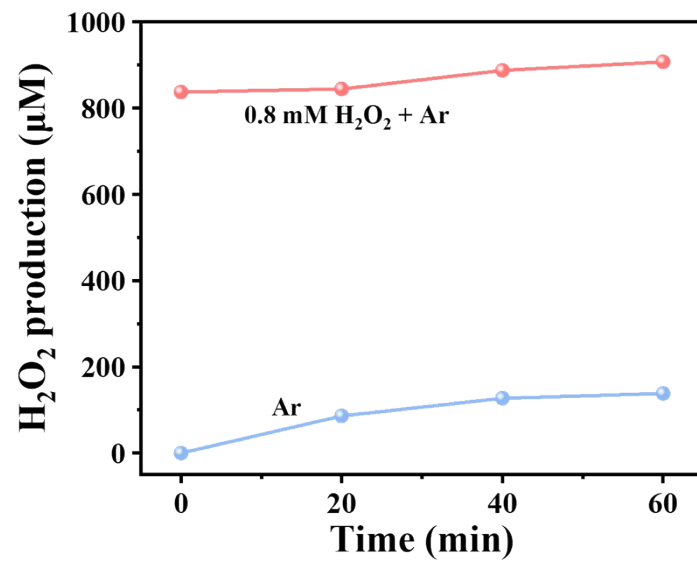

Figure S13: Decomposition of H<sub>2</sub>O<sub>2</sub> on the TCFPP-TPD surface.



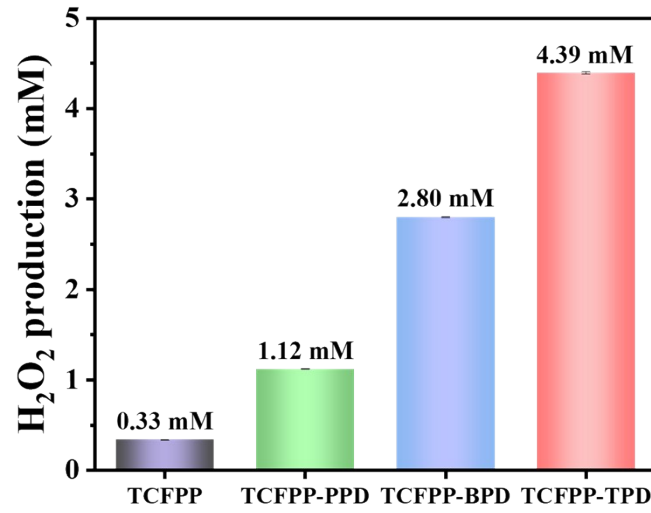

Figure S14: Histograms of the long time cumulative performance of TCFPP, TCFPP-PPD, TCFPP-BPD and TCFPP-TPD.

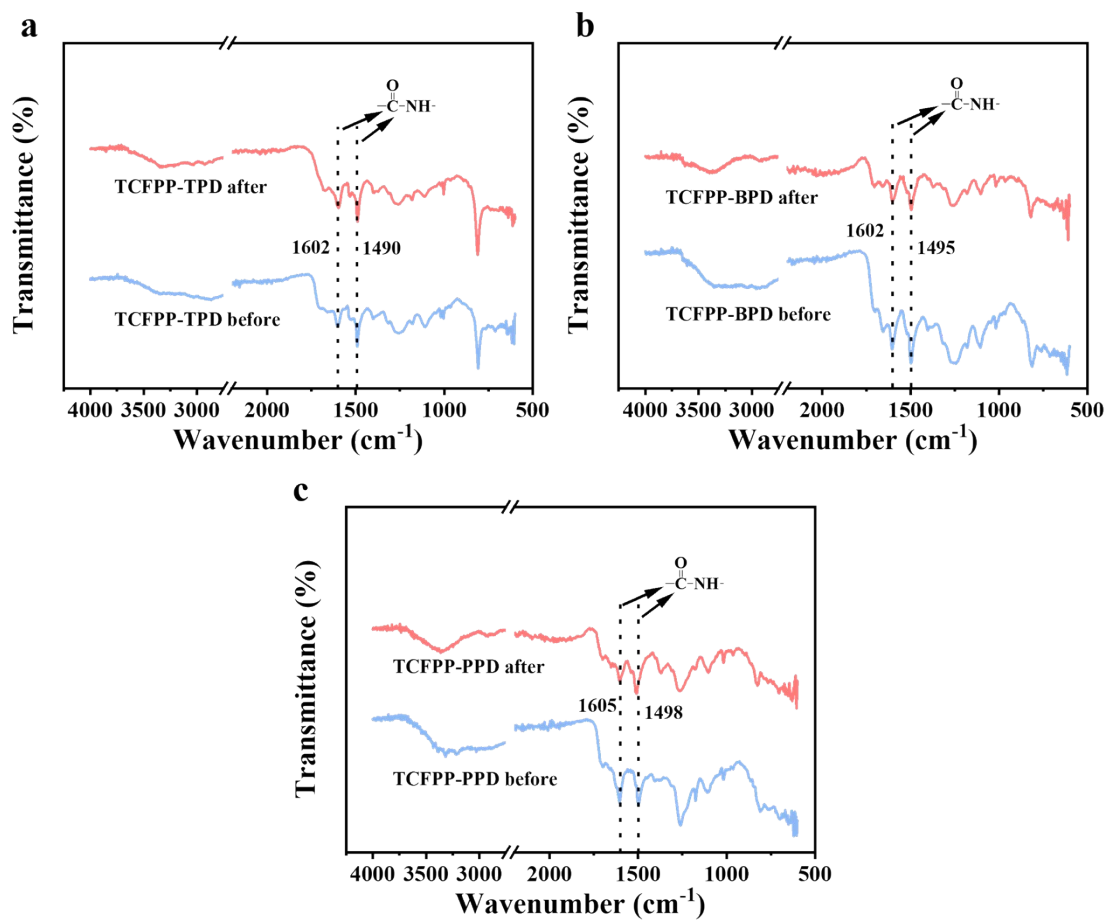

Figure S15: FT-IR before and after the reaction of (a) TCFPP-TPD, (b) TCFPP-BPD and (c) TCFPP-PPD.

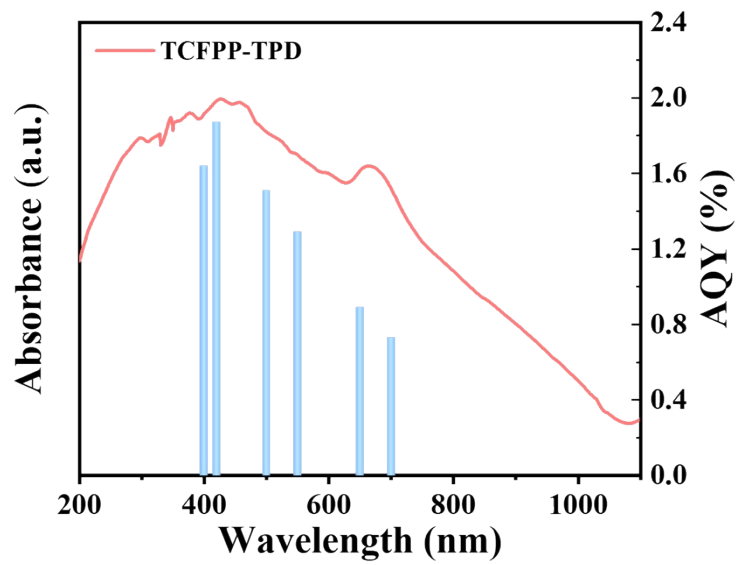

Figure S16: AQY of TCFPP-TPD at different single optical wavelengths.

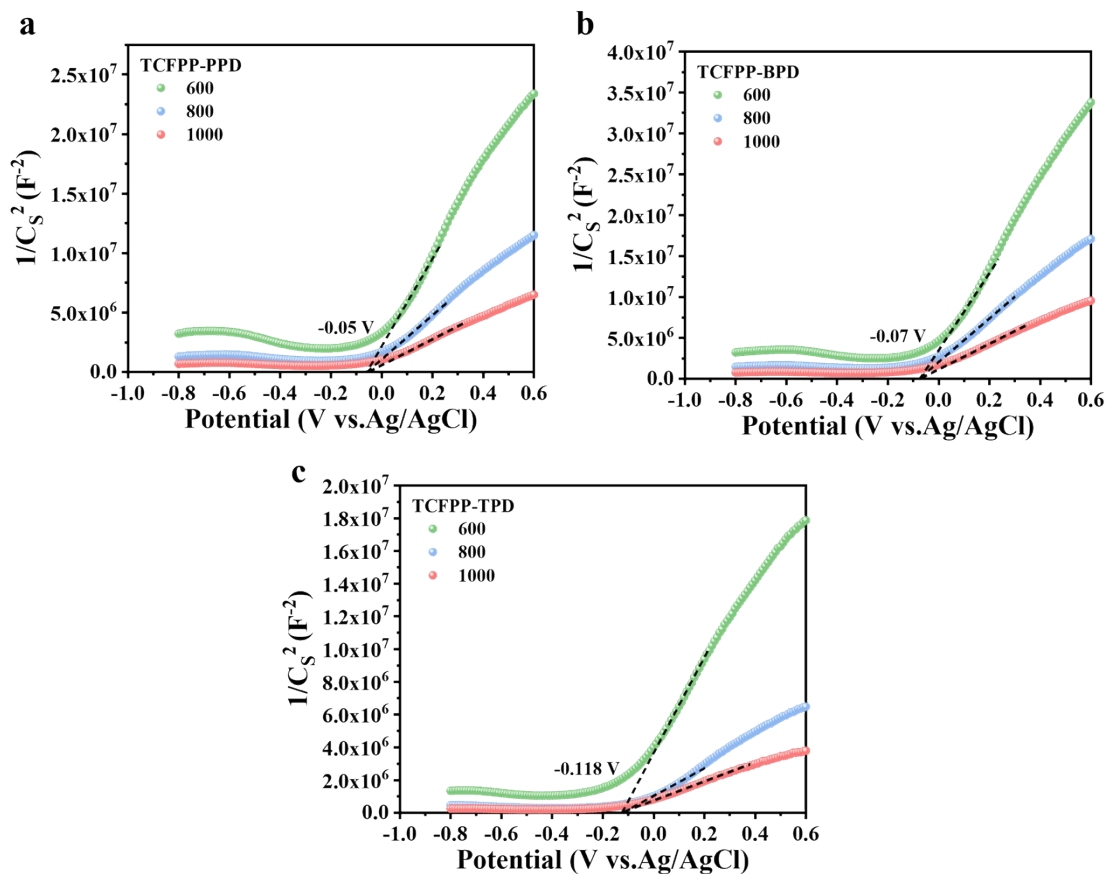

Figure S17: Mott mapping of (a) TCFPP-PPD, (b) TCFPP-BPD and (c) TCFPP-TPD.

The band edge positions of catalysts can be calculated using the following equation:

$$E_{CB} (V \text{ vs. } NHE) = E_{fb} (V \text{ vs. } AgCl/Ag) + 0.197 - X \text{-----Eq. s1}$$

$$E_{VB} = E_{CB} + E_{g\text{-----}} \text{Eq. s2}$$

Where  $E_{VB}$  and  $E_{CB}$  stand for the valence band edge potential and conduction band edge potential, respectively; X is the voltage difference between the conduction band value and the flat potential value, generally 0.1-0.3 eV (the conduction bands of n-type semiconductors are normally 0.1-0.3 eV deeper than the flat-band potential). Therefore, the conduction band position is obtained by subtracting 0.2 eV from the potential of each flat band.

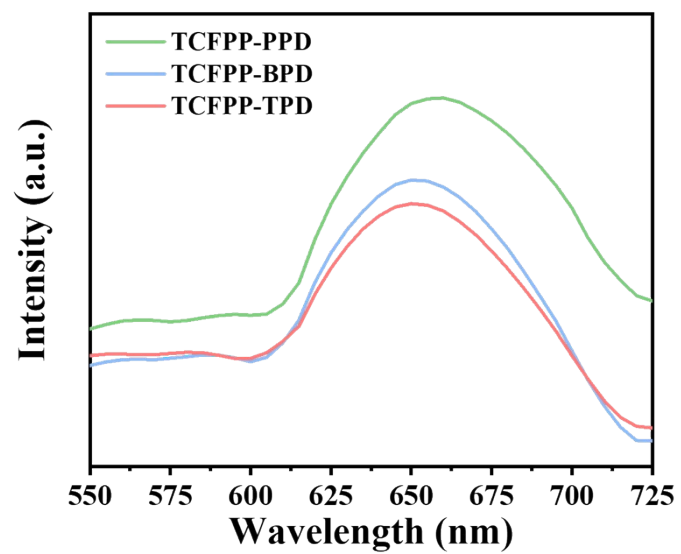

Figure S18: PL mapping of TCFPP-PPD, TCFPP-BPD and TCFPP-TPD.

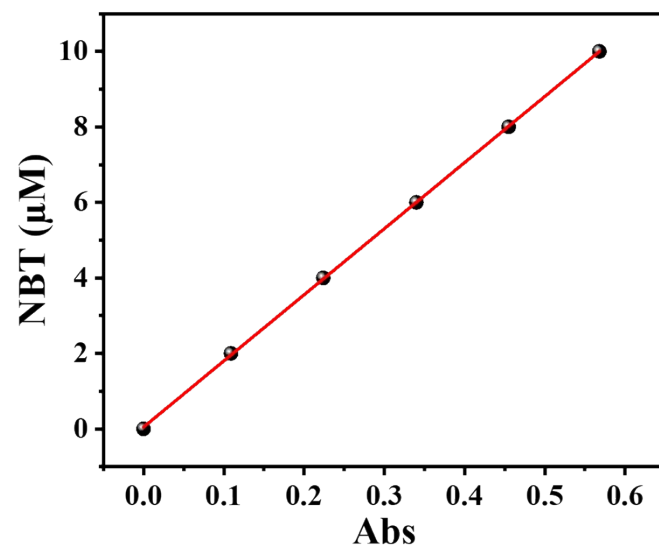

Figure S19: Fitted curve of UV-visible absorbance with NBT concentration.

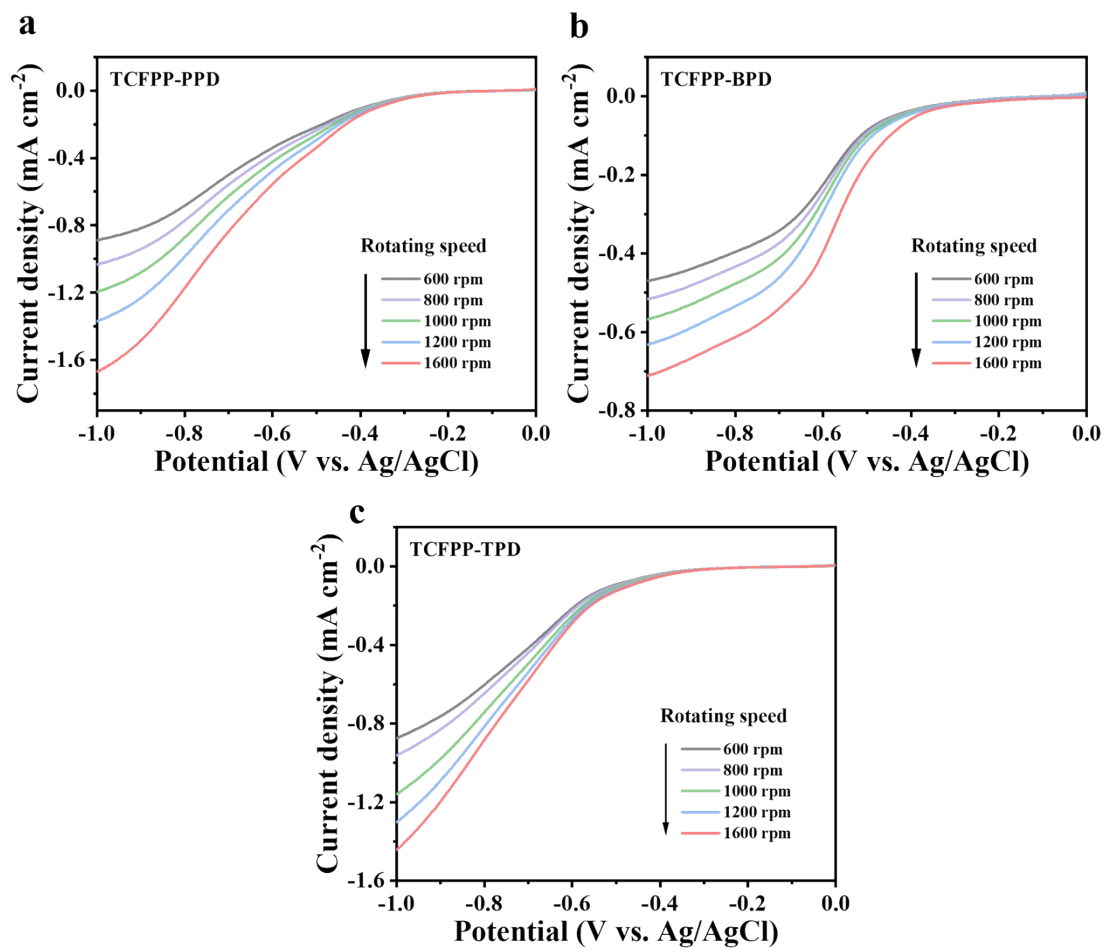

Figure S20: Linear scanning RDE voltammograms of (a) TCFPP-PPD, (b) TCFPP-BPD and (c) TCFPP-TPD.

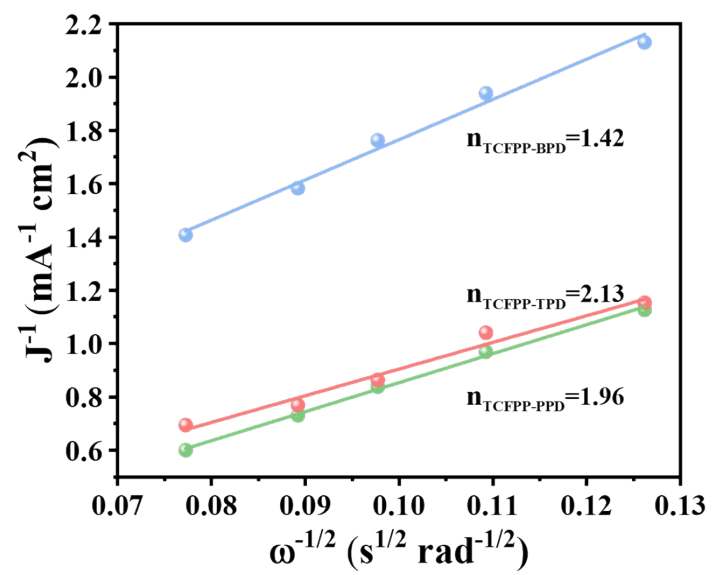

Figure S21: Koutecky-Levich diagram obtained from RDE measurements.



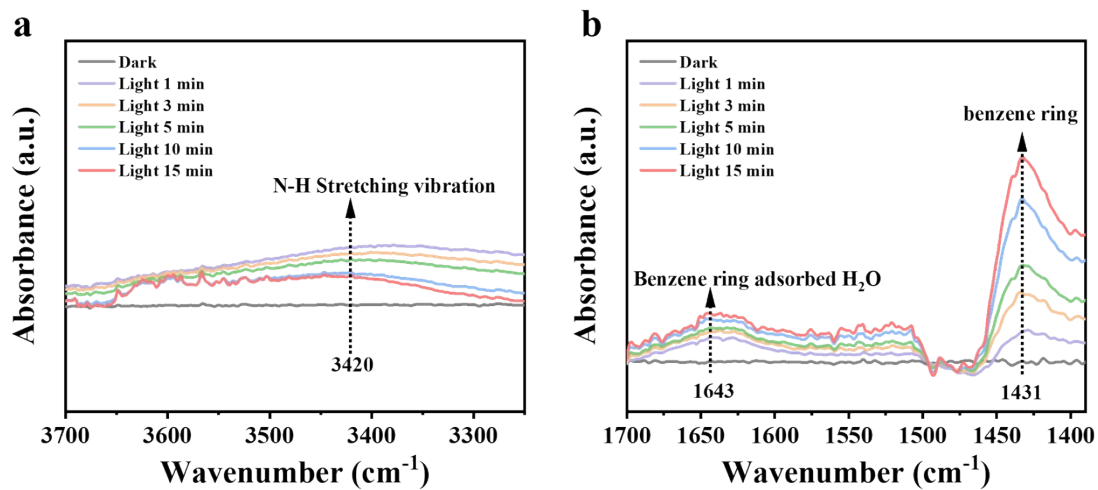

Figure S22: In situ FT-IR of TCFPP-TPD (a) 3700  $\text{cm}^{-1}$ -3250  $\text{cm}^{-1}$ ; (b) 1700  $\text{cm}^{-1}$ -1390  $\text{cm}^{-1}$ .

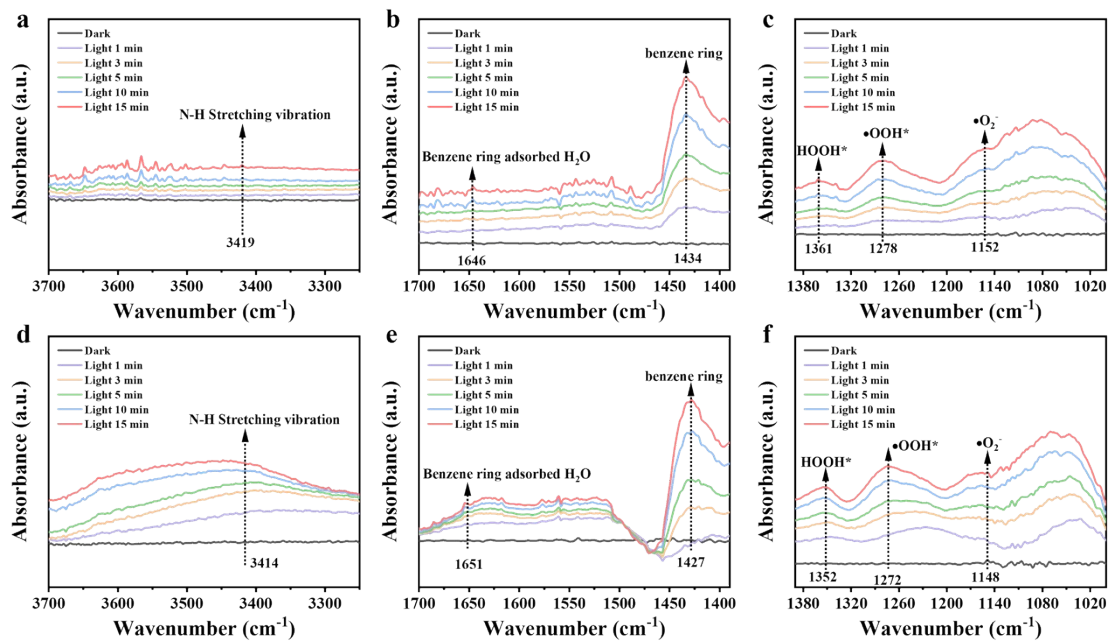

Figure S23: In situ FT-IR of TCFPP-PPD (a) 3700  $\text{cm}^{-1}$ -3250  $\text{cm}^{-1}$ ; (b) 1700  $\text{cm}^{-1}$ -1390  $\text{cm}^{-1}$ ; (c) 1390  $\text{cm}^{-1}$ -1000  $\text{cm}^{-1}$ ; In situ FT-IR of TCFPP-BPD (d) 3700  $\text{cm}^{-1}$ -3250  $\text{cm}^{-1}$ ; (e) 1700  $\text{cm}^{-1}$ -1390  $\text{cm}^{-1}$ ; and (f) 1390  $\text{cm}^{-1}$ -1000  $\text{cm}^{-1}$ .

Table S1: Comparison of H<sub>2</sub>O<sub>2</sub> production from polymer photocatalytic materials.

| Photocatalyst                     | H <sub>2</sub> O <sub>2</sub> yield rate/<br>μmol·g <sup>-1</sup> ·h <sup>-1</sup> | Irradiated<br>conditions | Solvent                     | AQY            | Ref              |
|-----------------------------------|------------------------------------------------------------------------------------|--------------------------|-----------------------------|----------------|------------------|
| RF-523                            | 51.7 μmol·g <sup>-1</sup> ·h <sup>-1</sup>                                         | λ > 420 nm               | H <sub>2</sub> O            | 8% (420 nm)    | 1                |
| PEI/C <sub>3</sub> N <sub>4</sub> | 208.1 μmol·g <sup>-1</sup> ·h <sup>-1</sup>                                        | AM 1.5                   | H <sub>2</sub> O            | 2.1% (420 nm)  | 2                |
| TAPD-(Me) <sub>2</sub> COF        | 234.52 μmol·g <sup>-1</sup> ·h <sup>-1</sup>                                       | λ > 420 nm               | H <sub>2</sub> O:EtOH (1:9) | N.A            | 3                |
| OCN-500                           | 106 μmol·g <sup>-1</sup> ·h <sup>-1</sup>                                          | λ > 420 nm               | H <sub>2</sub> O            | 10.2% (420 nm) | 4                |
| DE7-M                             | 2200 μmol·g <sup>-1</sup> ·h <sup>-1</sup>                                         | λ > 300 nm               | H <sub>2</sub> O            | 8.7% (420 nm)  | 5                |
| CHF-DPDA                          | 256 μmol·g <sup>-1</sup> ·h <sup>-1</sup>                                          | λ > 420 nm               | H <sub>2</sub> O            | 16% (420 nm)   | 6                |
| EBA-COF                           | 1830 μmol·g <sup>-1</sup> ·h <sup>-1</sup>                                         | λ > 420 nm               | H <sub>2</sub> O:EA(9:1)    | 4.4% (420 nm)  | 7                |
| COF-TfpBpy                        | 1042 μmol·g <sup>-1</sup> ·h <sup>-1</sup>                                         | λ > 420 nm               | H <sub>2</sub> O            | 8.1% (420 nm)  | 8                |
| TDB-COF                           | 723.5 μmol·g <sup>-1</sup> ·h <sup>-1</sup>                                        | AM 1.5                   | H <sub>2</sub> O            | 1.4% (365 nm)  | 9                |
| TaptBtt                           | 1407 μmol·g <sup>-1</sup> ·h <sup>-1</sup>                                         | λ > 420 nm               | H <sub>2</sub> O            | 4.6% (450 nm)  | 10               |
| TCFPP-TPD                         | 1180 μmol·g <sup>-1</sup> ·h <sup>-1</sup>                                         | λ > 420 nm               | H <sub>2</sub> O            | 1.87% (420 nm) | <b>This work</b> |

## References

1. Y. Shiraishi, T. Takii, T. Hagi, S. Mori, Y. Kofuji, Y. Kitagawa, S. Tanaka, S. Ichikawa and T. Hirai, *Nature Materials* **2019**, *18*, 985–993.
2. X. Zeng, Y. Liu, Y. Kang, Q. Li, Y. Xia, Y. Zhu, H. Hou, M. H. Uddin, T. R. Gengenbach, D. Xia, C. Sun, D. T. McCarthy, A. Deletic, J. Yu and X. Zhang, *ACS Catalysis* **2020**, *10*, 3697–3706.
3. C. Krishnaraj, H. Sekhar Jena, L. Bourda, A. Laemont, P. Pachfule, J. Roeser, C. V. Chandran, S. Borgmans, S. M. J. Rogge, K. Leus, C. V. Stevens, J. A. Martens, V. Van Speybroeck, E. Breynaert, A. Thomas and P. Van Der Voort, *Journal of the American Chemical Society* **2020**, *142*, 20107–20116.
4. Z. Wei, M. Liu, Z. Zhang, W. Yao, H. Tan and Y. Zhu, *Energy & Environmental Science* **2018**, *11*, 2581–2589.
5. L. Liu, M.-Y. Gao, H. Yang, X. Wang, X. Li and A. I. Cooper, *Journal of the American Chemical Society* **2021**, *143*, 19287–19293.
6. H. Cheng, H. Lv, J. Cheng, L. Wang, X. Wu and H. Xu, *Advanced Materials* **2022**, *34*, 2107480.
7. L. Zhai, Z. Xie, C.-X. Cui, X. Yang, Q. Xu, X. Ke, M. Liu, L.-B. Qu, X. Chen and L. Mi, *Chemistry of Materials* **2022**, *34*, 5232–5240.
8. M. Kou, Y. Wang, Y. Xu, L. Ye, Y. Huang, B. Jia, H. Li, J. Ren, Y. Deng, J. Chen, Y. Zhou, K. Lei, L. Wang, W. Liu, H. Huang and T. Ma, *Angewandte Chemie International Edition* **2022**, *61*, e202200413.
9. Z. Zhou, M. Sun, Y. Zhu, P. Li, Y. Zhang, M. Wang and Y. Shen, *Applied Catalysis B: Environmental* **2023**, *334*, 122862.
10. C. Qin, X. Wu, L. Tang, X. Chen, M. Li, Y. Mou, B. Su, S. Wang, C. Feng, J. Liu, X. Yuan, Y. Zhao and H. Wang, *Nature Communications* **2023**, *14*, 5238.
